# Supplementary material
Source: PubMed Central journal article supplement (PMC3458438)

# Density Variant Glycan Microarray for Evaluating Crosslinking of Mucin-like Glycoconjugates by Lectins.

Kamil Godula<sup>†,‡,|</sup> and Carolyn R. Bertozzi<sup>\*,†,‡,§,||</sup>

<sup>†</sup>Department of Chemistry, <sup>‡</sup>Department of Molecular and Cell Biology, and <sup>§</sup>The Howard Hughes Medical Institute, University of California, Berkeley, California 94720. <sup>|</sup>Materials Sciences Division and <sup>||</sup>The Molecular Foundry, Lawrence Berkeley National Laboratory, Berkeley, California 94720

## Supporting Information

- Content:**
1. <sup>1</sup>H NMR spectra of pMVK precursors **3**, **4**, **7**, and **8**, and glycopolymers **6** and **9**.
  2. SEC traces of pMVK polymers **3**, **4**, **7**, and **8**.
  3. Determination of Mw of lectin monomers by SDS-PAGE.
  4. Determination of apparent Mw of all lectins by FPLC.
  5. Mucin mimetic array characterization.
    - A) Images of a low-density array with polymers **6a-e**.
    - B) Printing parameters.
    - C) Derivation of equation 2 for the determination of average polymer spacing.
  6. Images of a density variant array of polymer **9** and a plot of average polymer spacing.
  7. Plot of average GalNAc density as a function of glycopolymer spacing.
  8. Generation of a reduced, non-agglutinating form of WFL, RWFL.
  9. Tables and charts:

**Table S1.** Stoichiometry and efficiency of aminoxy-GalNAc (**5**) ligation to keto groups in polymers **4** and **8**.

**Table S2.** Buffers, extinction coefficients at  $\lambda = 280$ , and extent of lectin labeling with AF647-NHS.

**Table S3.** Lectin dilutions and AF647/lectin ratios used in array assays.

**Tables S4-8.** Apparent  $K_d$  values for individual lectins.

**Chart S1.** Apparent  $K_d$ 's for lectins obtained from the lowest surface density array plotted against GalNAc valency in polymers **6**.

**Table S9.** Apparent  $K_d$  and  $K_{rel}$  values for lectins toward polymer **9** in a density variant array.

**Table S10.** SBA and HPA precipitation by soluble glycopolymers **6b**, **6e**, and **9**.

**Chart S2.** SBA and HPA precipitation by soluble glycopolymers **6b**, **6e**, and **9**.

1. <sup>1</sup>H NMR spectra of pMVK precursors 3, 4, 7, and 8, and glycopolymers 6 and 9.

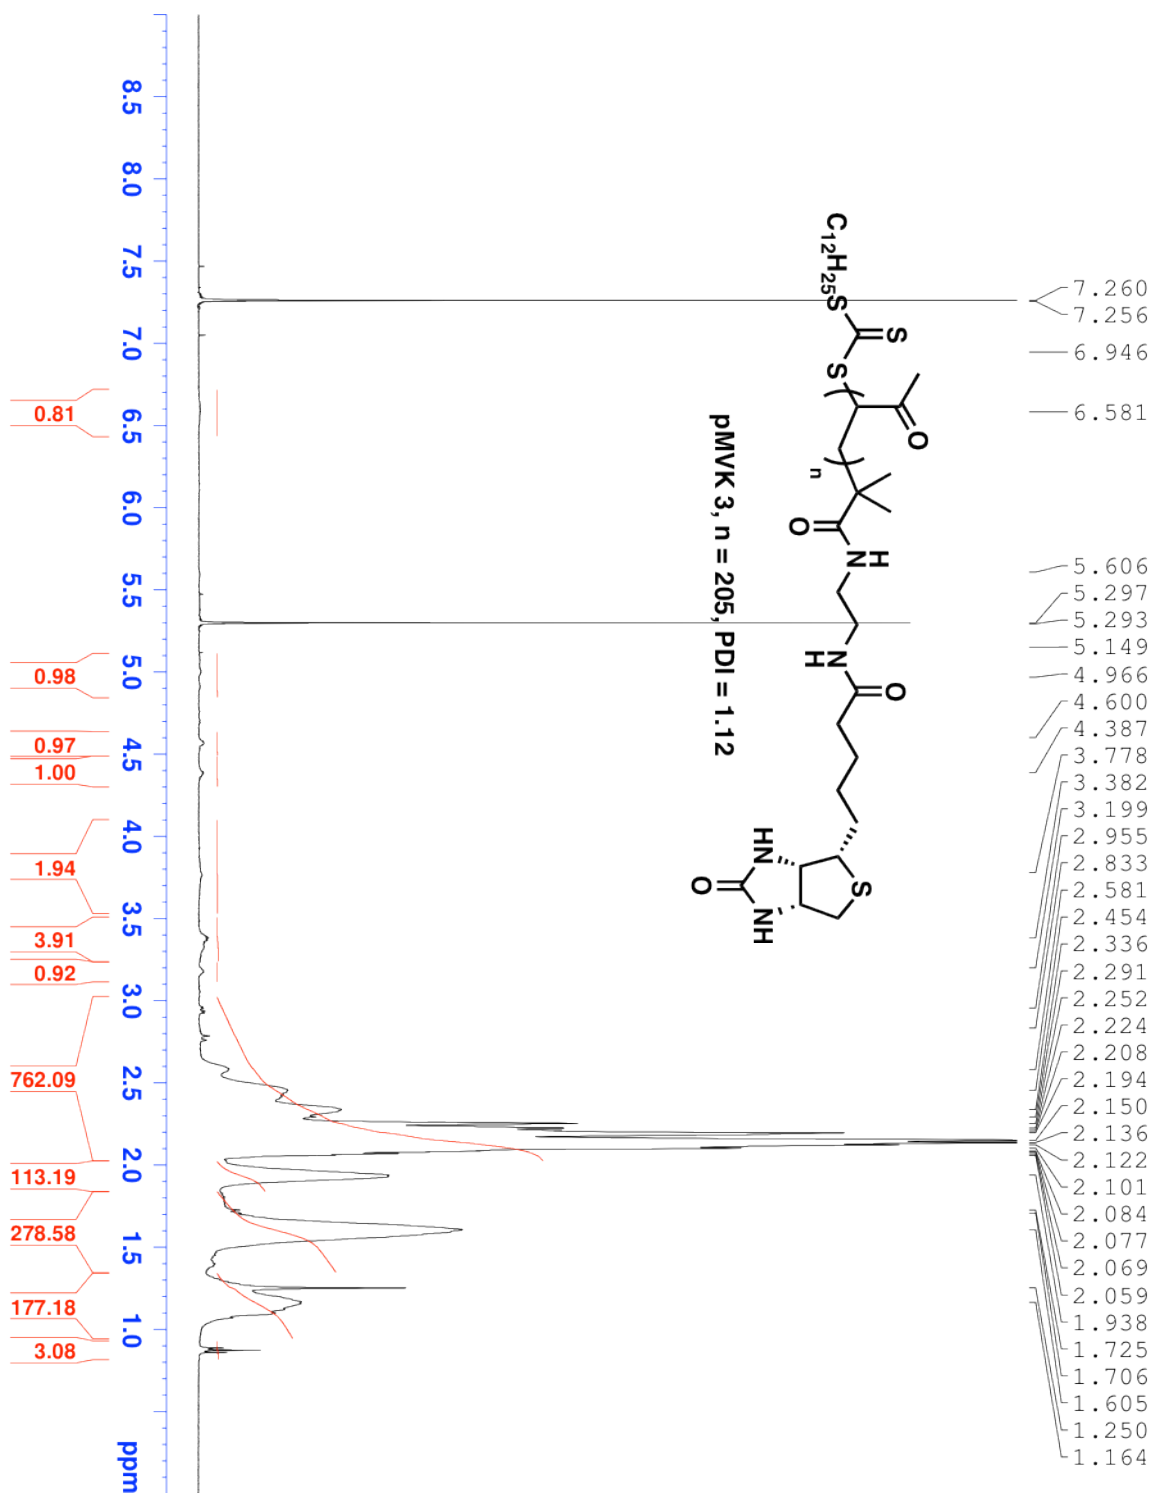

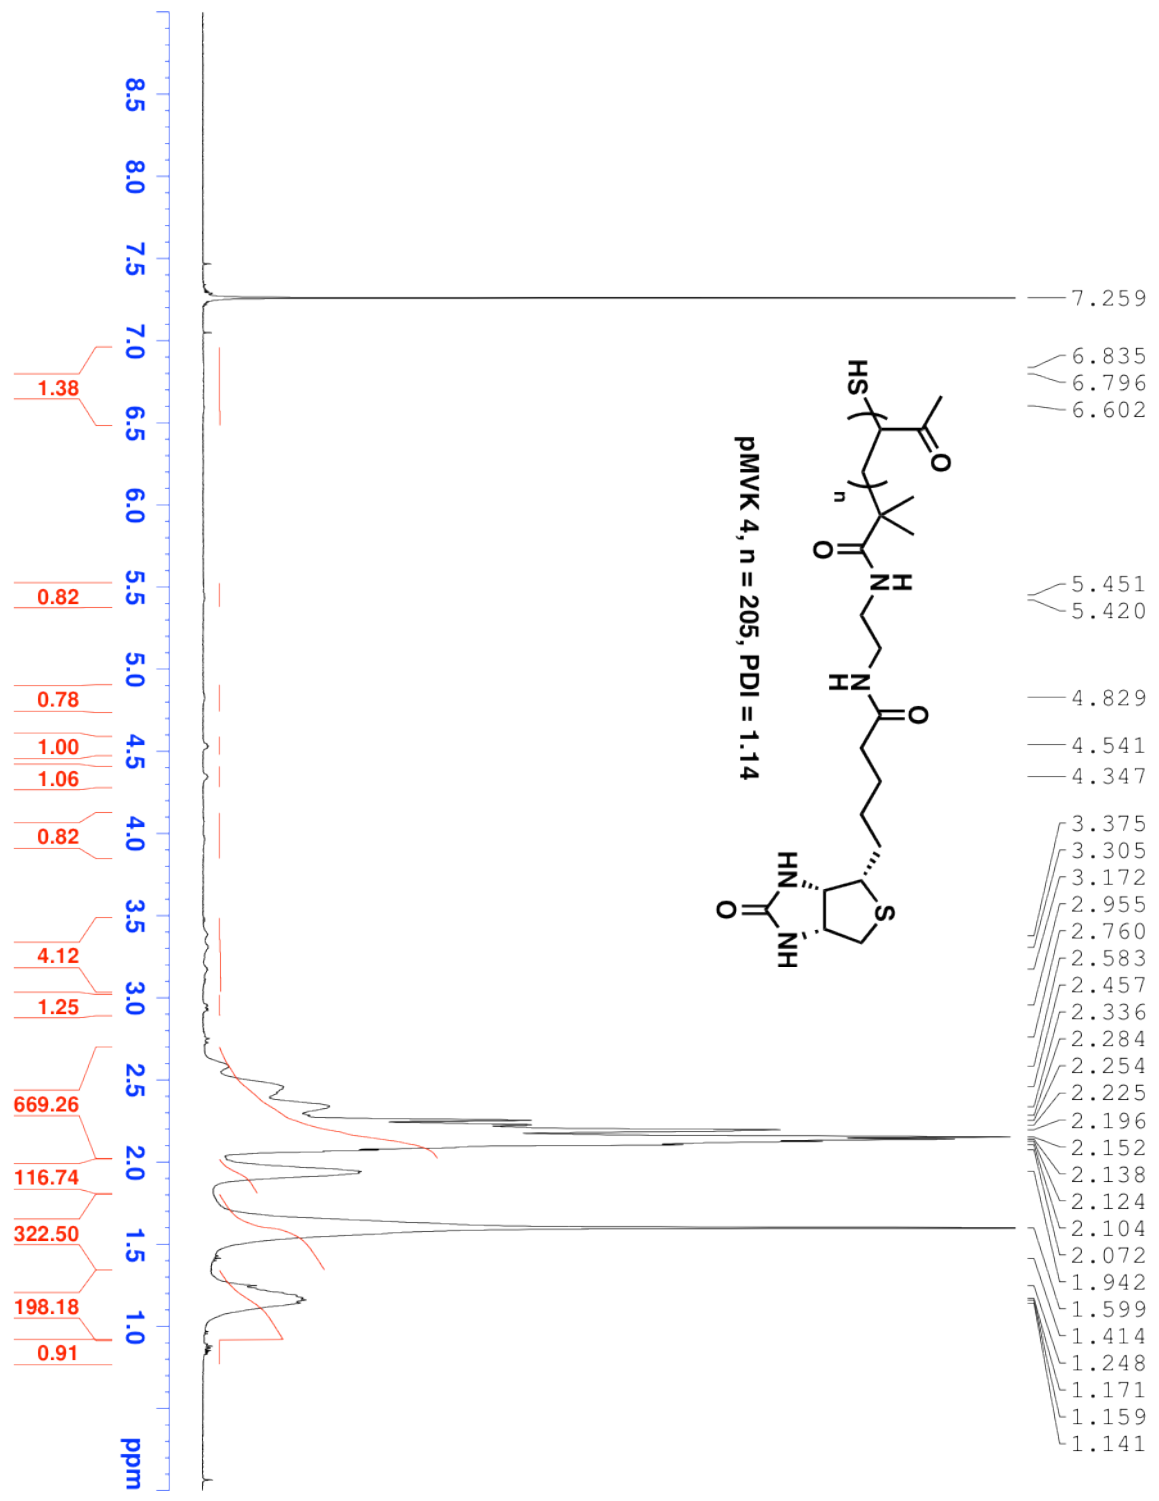

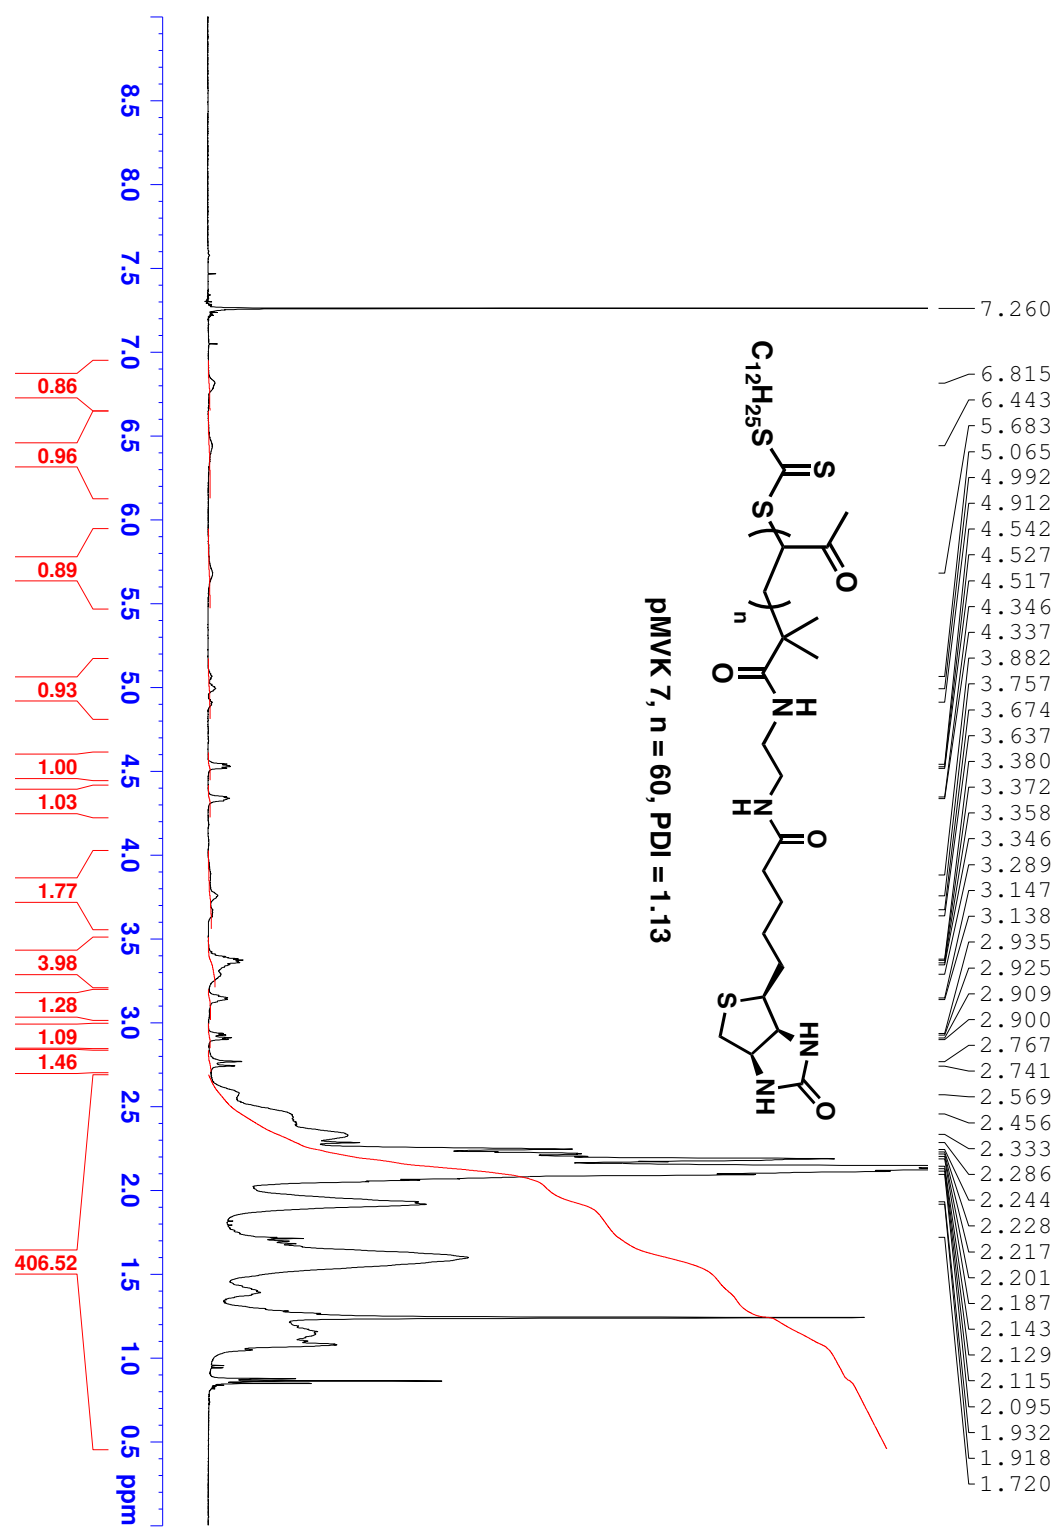

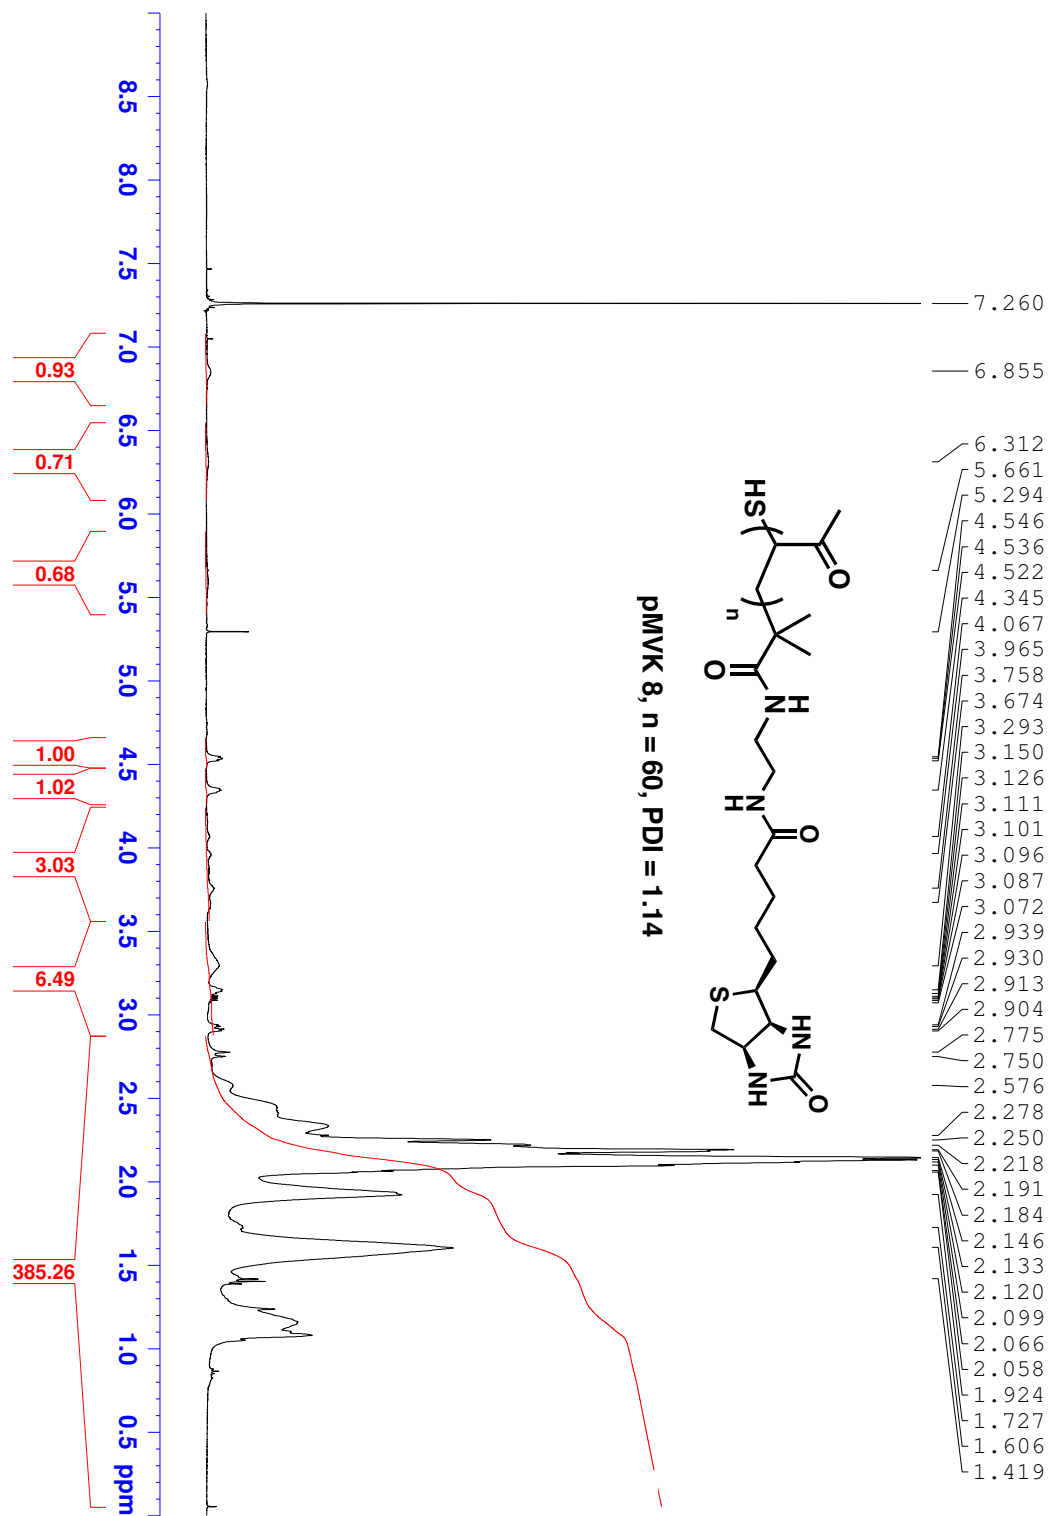

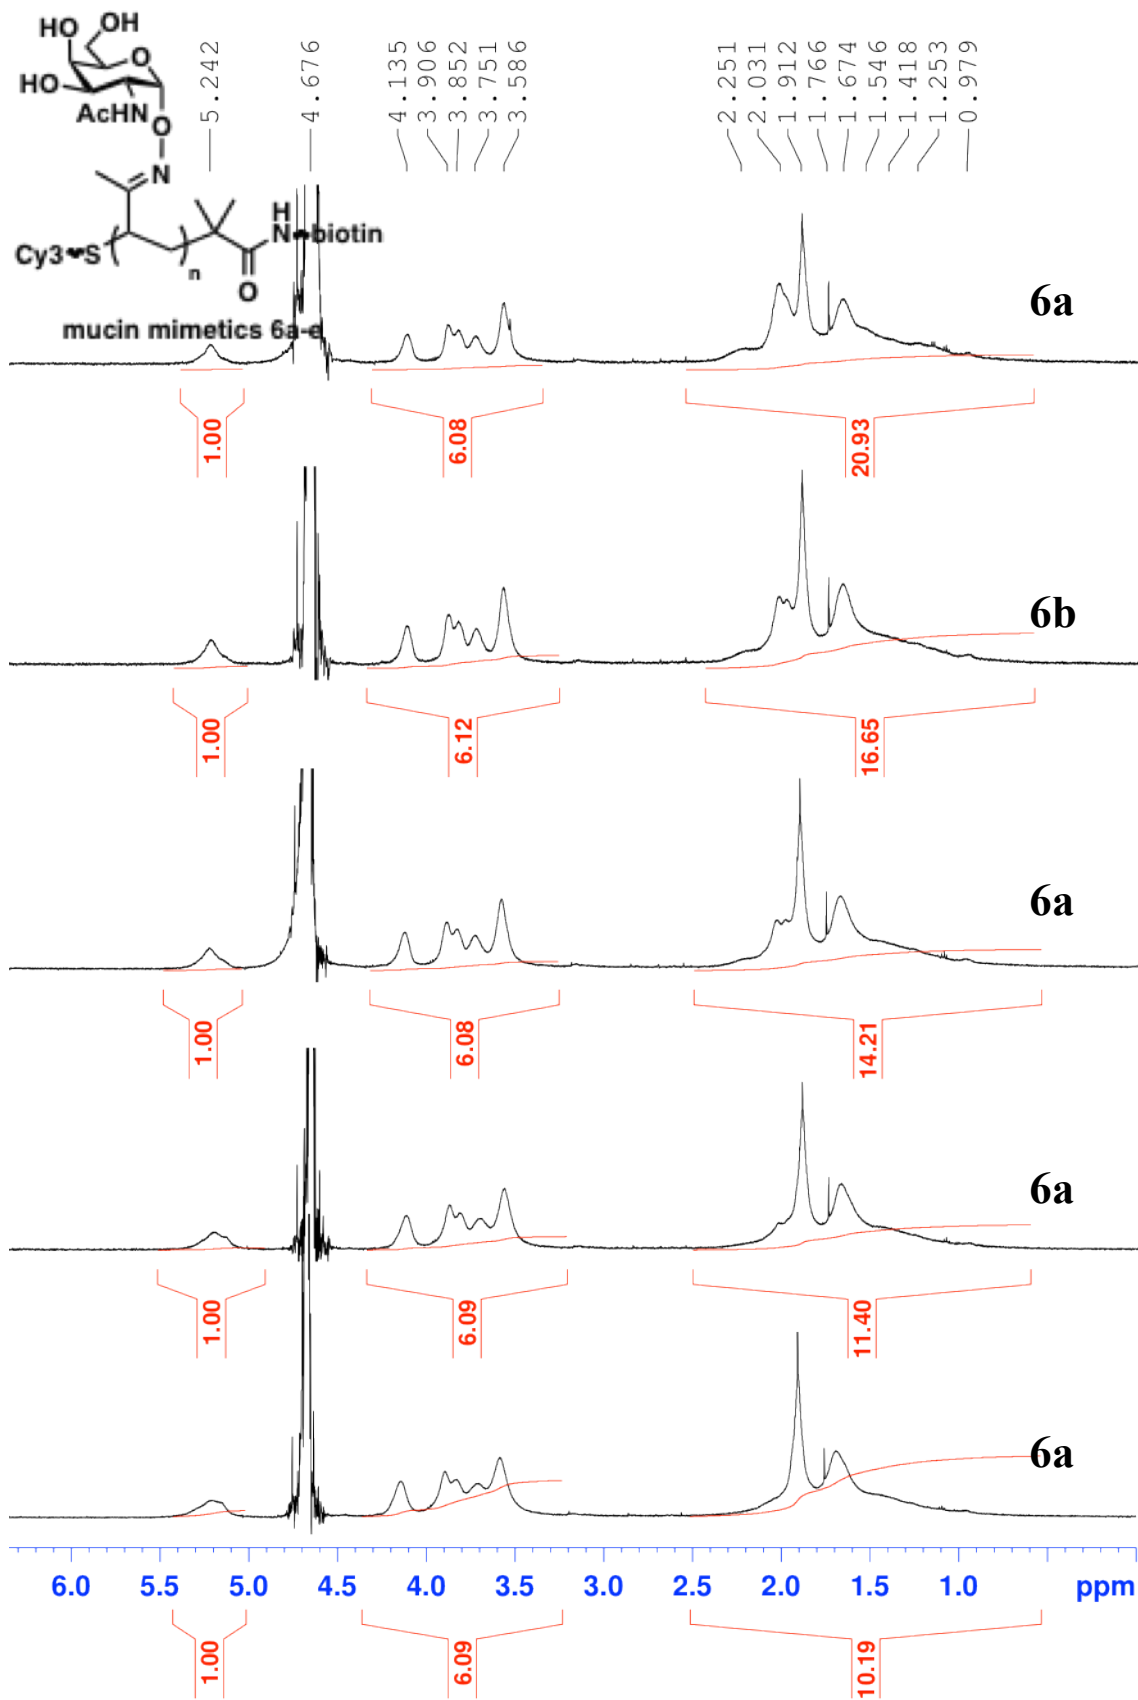

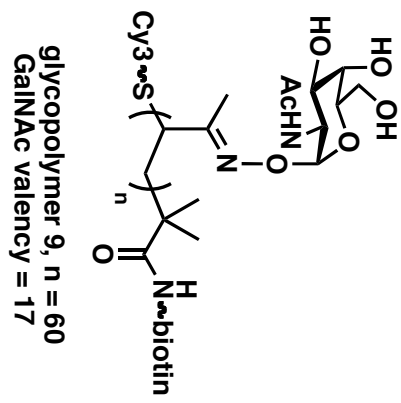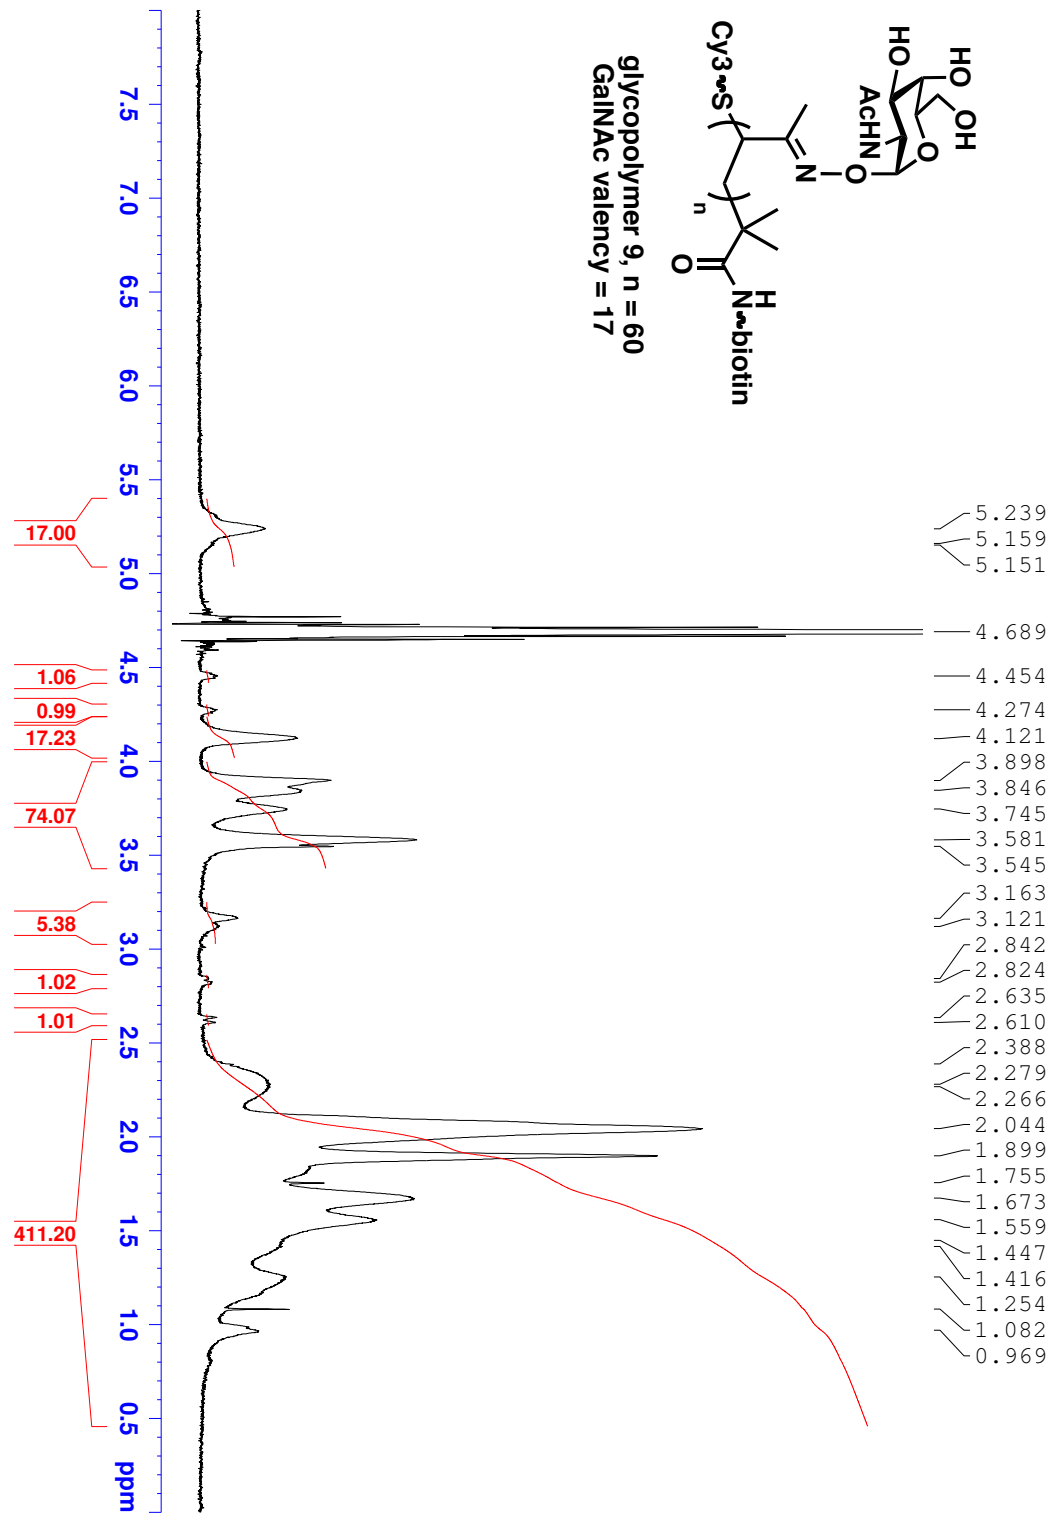



## 2. SEC traces of pMVK polymers 3, 4, 7, and 8.

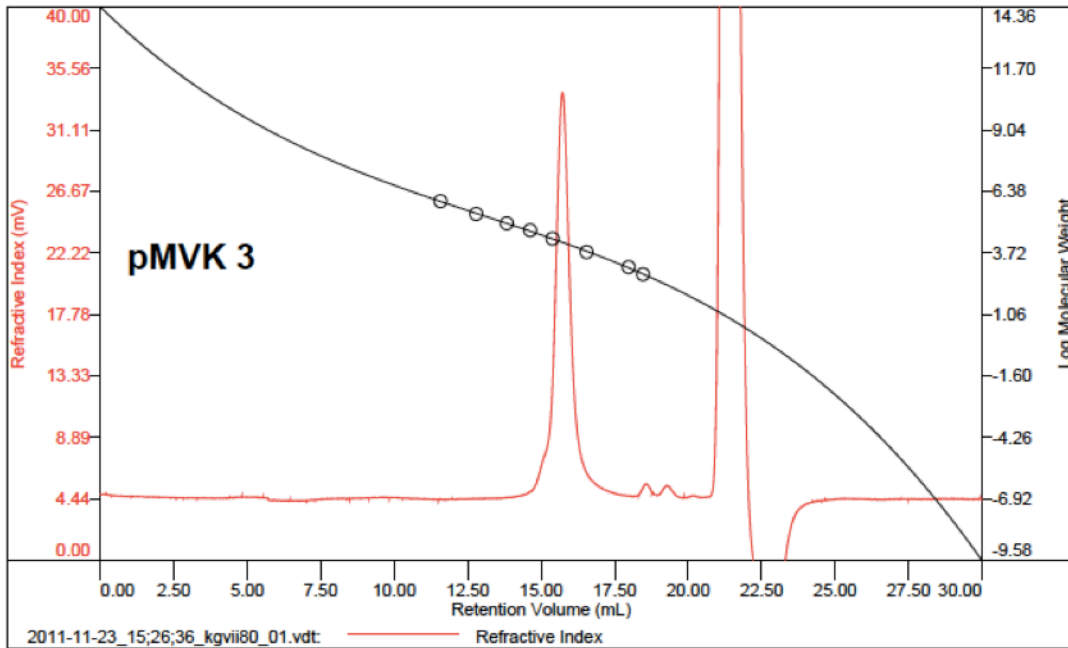

| Sample | Mn     | Mw     | Mz     | Mw/Mn |
|--------|--------|--------|--------|-------|
| pMVK 3 | 13,183 | 15,080 | 17,049 | 1.144 |

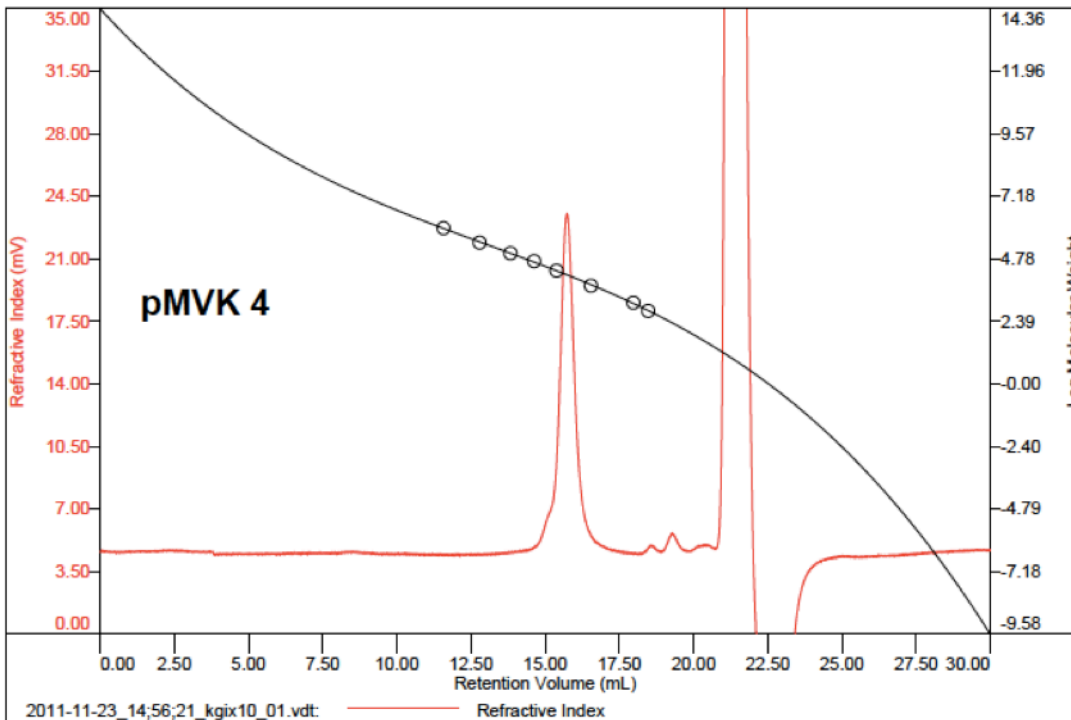

| Sample | Mn     | Mw     | Mz     | Mw/Mn |
|--------|--------|--------|--------|-------|
| pMVK4  | 13,426 | 15,255 | 17,233 | 1.136 |

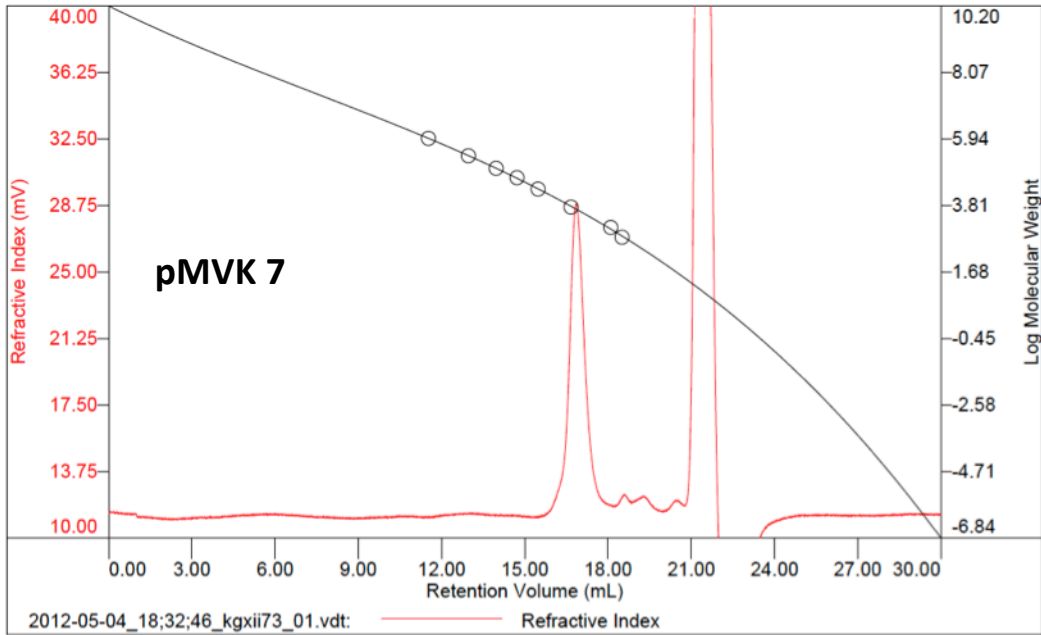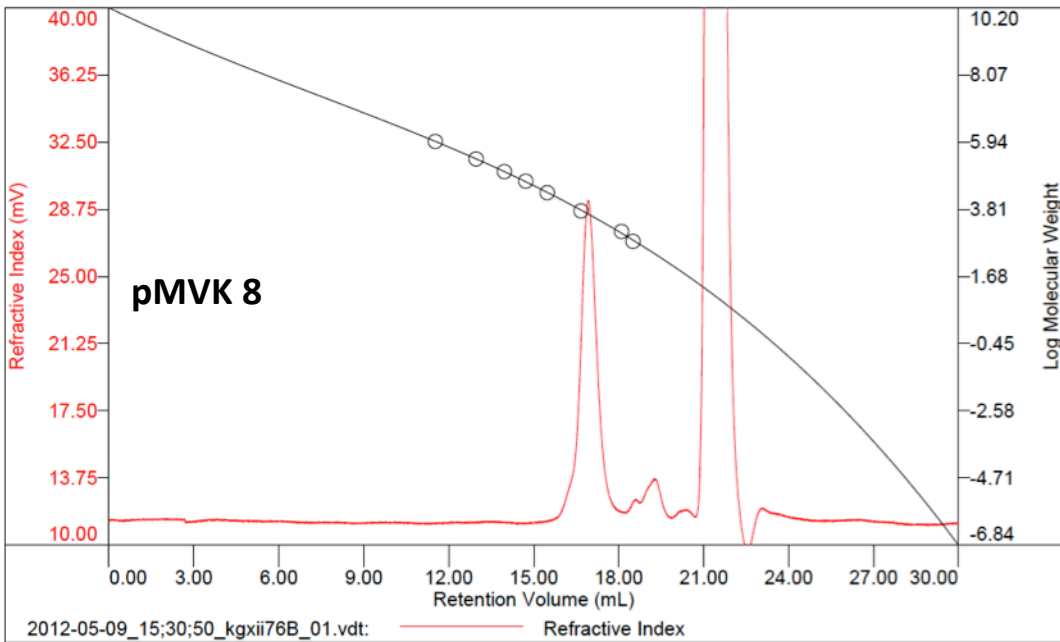

### 3. Determination of Mw of lectin monomers by SDS-PAGE.

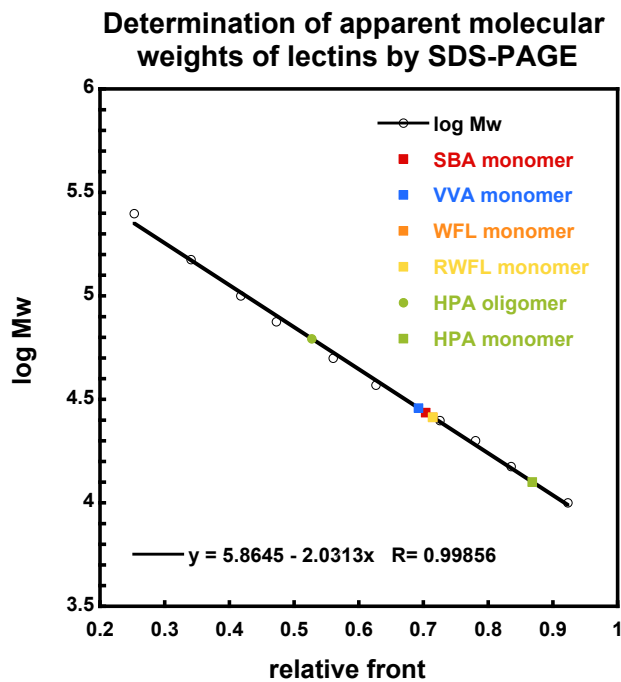

| Lectin       | relative front | Mw [Da] |
|--------------|----------------|---------|
| SBA monomer  | 0.70           | 27,283  |
| VVA monomer  | 0.69           | 28,722  |
| WFL monomer  | 0.71           | 25,916  |
| RWFL monomer | 0.71           | 25,916  |
| HPA oligomer | 0.53           | 62,093* |
| HPA monomer  | 0.87           | 12,620  |

\* the somewhat lower apparent Mw for HPA hexamer is consistent with previously reported observations (*ref. Renwrantz L. et al. J. Molluscan Studies* 2009, 75, 41-49).

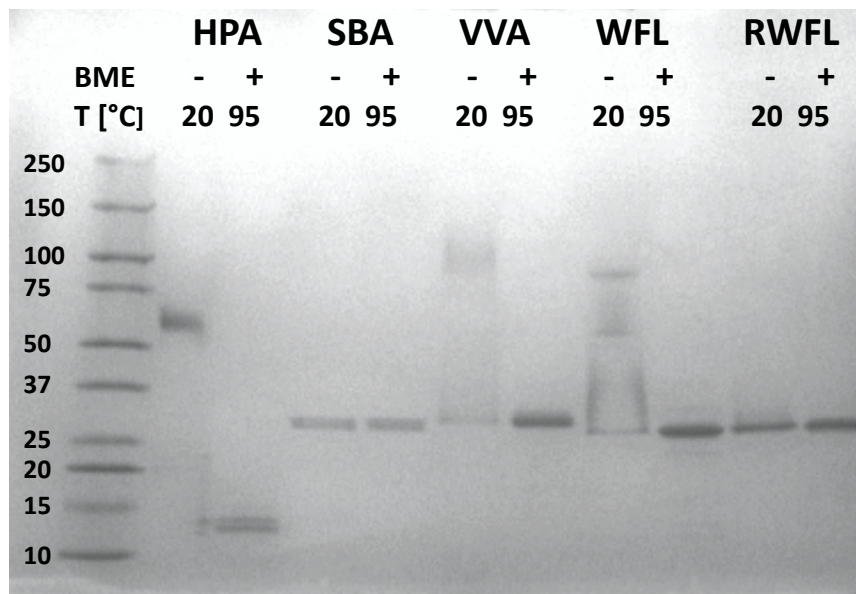

All lectins were dissociated into monomers by heating at 95 °C for 10 min in a loading buffer containing 5%  $\beta$ -mercaptoethanol (BME). Gel electrophoresis was performed on 4-20% PA gel in 0.1 % SDS in 1 x TRIS/glycine buffer, pH = 8.3.

\* only HPA oligomer showed stability under non-reducing SDS-PAGE conditions (lectin samples prepared in Laemmli loading buffer at 20 °C).

#### 4. Determination of apparent Mw of lectins by FPLC.

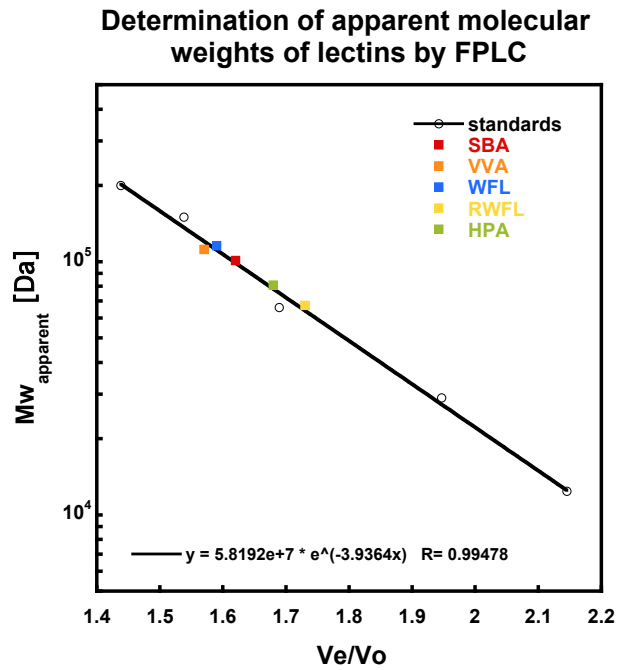

| Protein               | Mw [Da]        | Ve [mL]      | Ve/Vo       |
|-----------------------|----------------|--------------|-------------|
| Cytochrome c          | 12,400         | 17.96        | 2.15        |
| Carbonic anhydrase    | 29,000         | 16.30        | 1.95        |
| Bovine serum albumin  | 66,000         | 14.14        | 1.69        |
| Alcohol dehydrogenase | 150,000        | 12.88        | 1.54        |
| $\beta$ -Amylase      | 200,000        | 12.04        | 1.44        |
| <b>SBA</b>            | <b>101,139</b> | <b>13.58</b> | <b>1.62</b> |
| <b>VVA</b>            | <b>111,843</b> | <b>13.37</b> | <b>1.60</b> |
| <b>WFL</b>            | <b>105,709</b> | <b>13.49</b> | <b>1.61</b> |
| <b>RWFL</b>           | <b>67,317</b>  | <b>14.45</b> | <b>1.73</b> |
| <b>HPA</b>            | <b>80,862</b>  | <b>14.06</b> | <b>1.68</b> |

## 5. Mucin mimetic array characterization

### A) Images of a low-density array with polymers 6a-e.

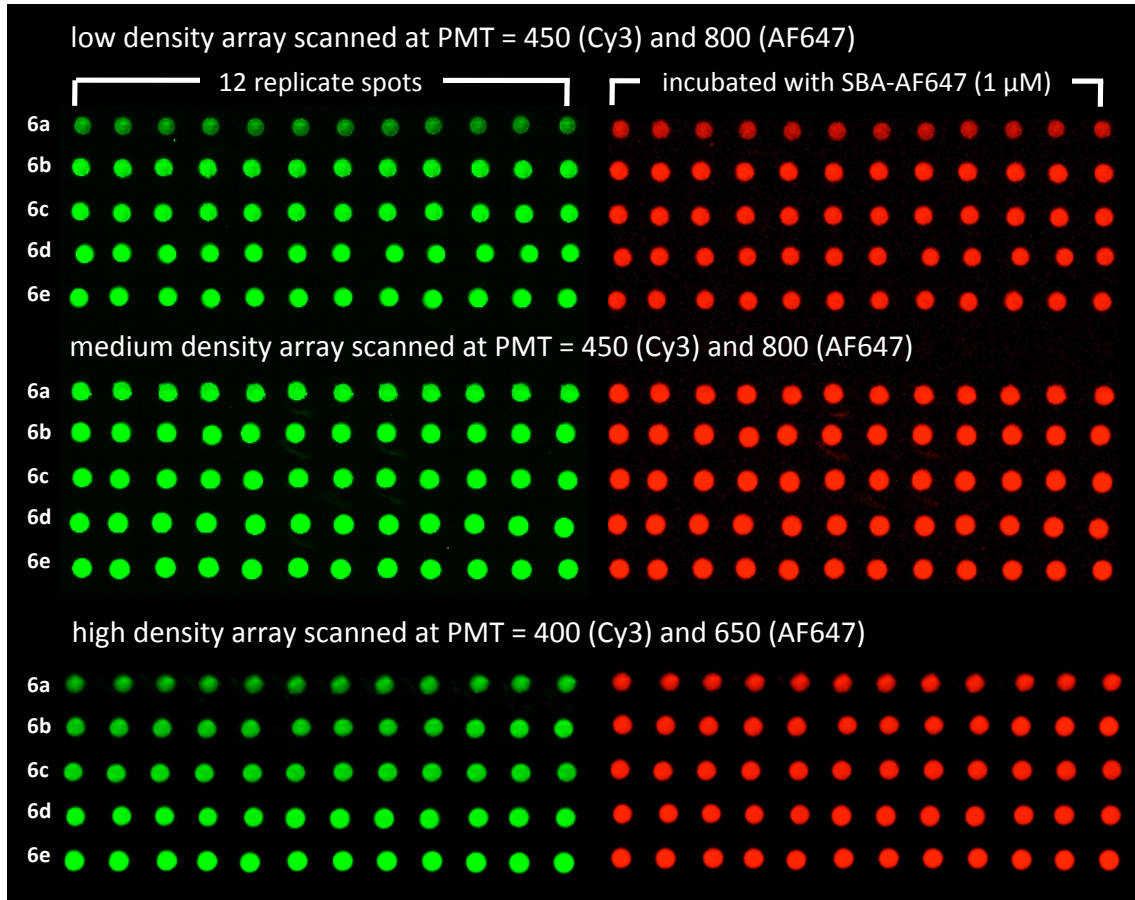

### B) Printing parameters.

wash cycles: 3, wash time: 3,000 msec, dry time: 8,000 msec  
 load time: 500 msec  
 slow pickup speed 2000  
 x-axis acceleration 6,000,000  
 y-axis acceleration 6,000,000  
 z-axis acceleration/deacceleration 3,500,000/350,000 (soft tap)

### C) Derivation of equation 2 for the determination of average polymer spacing.

$$\rho = \frac{n_2 \cdot N_A}{\pi(r_{spot})^2}, \quad \rho \dots\dots \text{polymer surface density [nm}^{-2}\text{]}$$

$$\Delta = \frac{1}{\sqrt{\rho}} = \frac{1}{\sqrt{\frac{n_2 \cdot N_A}{\pi(r_{spot})^2}}} = \frac{r_{spot} \cdot \sqrt{\pi}}{\sqrt{n_2 \cdot N_A}}, \quad \Delta \dots\dots \text{average spacing [nm]}$$

6. Images of a density variant array of polymer 9 and a plot of average polymer spacing.

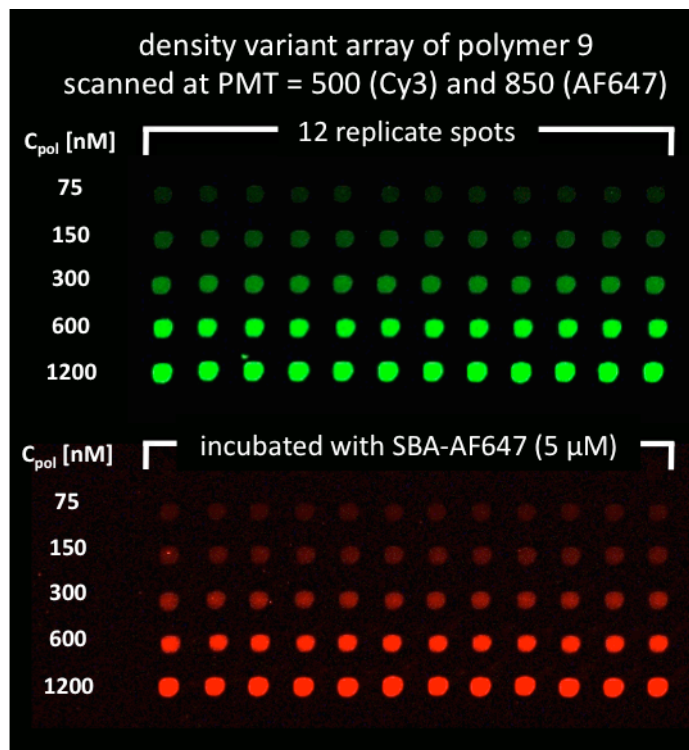

Average spacing of polymer 9 in density variant array

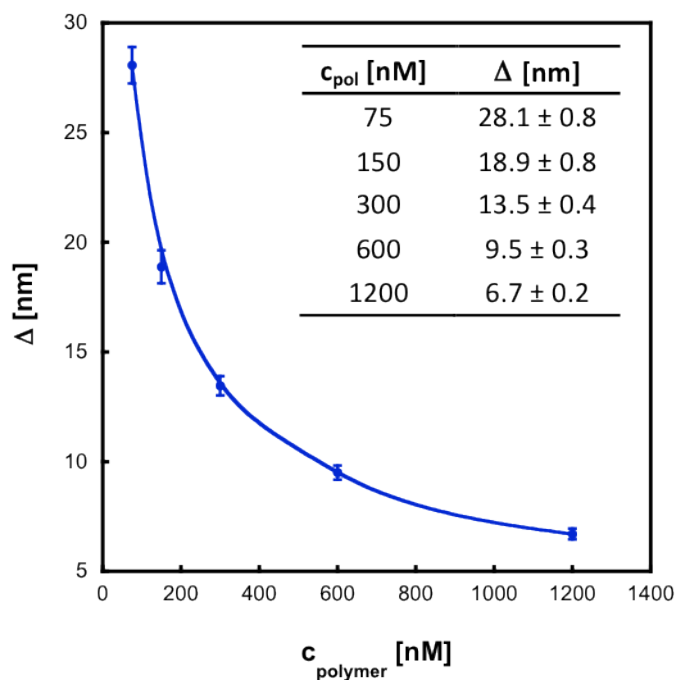

7. Plot of average GalNAc density as a function of glycopolymer spacing.

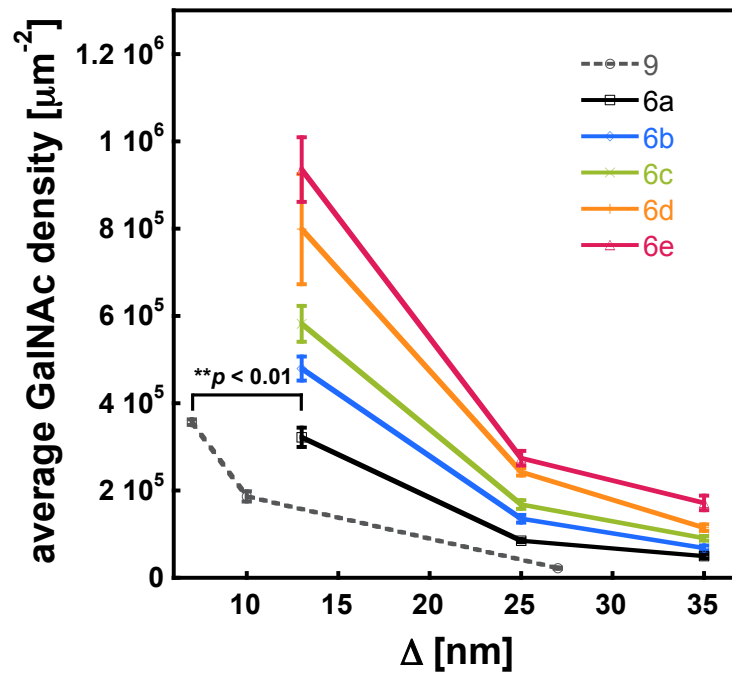

## 8. Generation of a reduced, non-agglutinating form of WFL, RWFL.

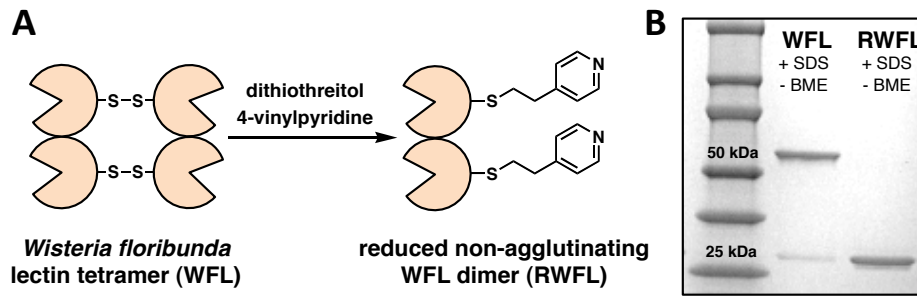

**Figure S1.** A) The disulfide bridged WFL tetramer was cleaved under reductive conditions followed by capping of the resulting free sulfhydryl groups with 4-vinylpyridine. B) SDS-PAGE showed complete reduction of WFL to RWFL (SDS = sodium dodecyl sulfate, BME =  $\beta$ -mercaptoethanol).



## 9. Tables and Charts.

**Table S1.** Stoichiometry and efficiency of aminoxy-GalNAc (**5**) ligation to keto groups in polymers **4** and **8**.

| entry    | equiv. of <b>5</b> | product   | GalNAc valency (%n) |
|----------|--------------------|-----------|---------------------|
| <b>1</b> | 0.3                | <b>6a</b> | 68 (33)             |
| <b>2</b> | 0.5                | <b>6b</b> | 92 (45)             |
| <b>3</b> | 0.6                | <b>6c</b> | 111 (54)            |
| <b>4</b> | 0.8                | <b>6d</b> | 146 (71)            |
| <b>5</b> | 1.0                | <b>6e</b> | 170 (83)            |
| <b>6</b> | 0.3                | <b>9</b>  | 17 (28)             |

**Table S2.** Buffers, extinction coefficients at  $\lambda = 280$ , and extent of lectin labeling with AF647-NHS.

| lectin-AF647 | buffer                                                             | $\epsilon_{280}$ [ $M^{-1}\cdot cm^{-1}$ ] | AF647/lectin |
|--------------|--------------------------------------------------------------------|--------------------------------------------|--------------|
| SBA          | 10 mM Na <sub>2</sub> HPO <sub>4</sub> ,<br>150 mM NaCl, pH = 7.3  | 108,400<br>(tetramer)*                     | 1.01         |
| WFL          | 10 mM TRIS,<br>150 mM NaCl,<br>0.5 mM CaCl <sub>2</sub> , pH = 8.5 | 155,200<br>(tetramer)*                     | 1.40         |
| RWFL         | 10 mM TRIS,<br>150 mM NaCl,<br>0.5 mM CaCl <sub>2</sub> , pH = 8.5 | 77,600<br>(dimer)*                         | 1.00         |
| VVA          | 10 mM Na <sub>2</sub> HPO <sub>4</sub> ,<br>150 mM NaCl, pH = 7.3  | 82,800<br>(tetramer)*                      | 1.97         |
| HPA          | 10 mM TRIS,<br>150 mM NaCl, pH = 8.0                               | 116,800<br>(hexamer)*                      | 1.14         |

\*Oligomerization state of lectins was confirmed experimentally by FPLC (Section 3).

**Table S3.** Lectin dilutions and AF647/lectin ratios used in array assays.

| lectin-AF647 | dilution series                                                                  | AF647/lectin  |
|--------------|----------------------------------------------------------------------------------|---------------|
| SBA          | 5 → 2.5 μM → 5 x dilution → 160 pM<br>10 → 5 μM → 5 x dilution → 320 pM (pol. 9) | 0.10/tetramer |
| WFL          | 5 → 2.5 μM → 5 x dilution → 160 pM                                               | 0.14/tetramer |
| RWFL         | 10 → 5 μM → 5 x dilution → 320 pM                                                | 0.11/dimer    |
| VVA          | 5 → 2.5 μM → 5 x dilution → 160 pM<br>10 → 5 μM → 5 x dilution → 320 pM (pol. 9) | 0.09/tetramer |
| HPA          | 2.5 μM → 5 x dilution → 32 pM                                                    | 0.10/hexamer  |

**Table S4.** Apparent  $K_d$  values for soybean agglutinin from *Glycine max* (SBA).

| pol.      | apparent $K_d$ [nM] |                      |         |                      |          |                      | p value <sup>2</sup> |
|-----------|---------------------|----------------------|---------|----------------------|----------|----------------------|----------------------|
|           | 13 nm               | p value <sup>1</sup> | 25 nm   | p value <sup>1</sup> | 35 nm    | p value <sup>1</sup> |                      |
| <b>6a</b> | 58 ± 6              |                      | 106 ± 4 |                      | 123 ± 27 |                      | 0.003                |
| <b>6b</b> | 51 ± 6              | 0.127                | 80 ± 4  | 0.005                | 87 ± 18  | 0.068                | 0.009                |
| <b>6c</b> | 50 ± 4              | 0.091                | 72 ± 5  | <0.001               | 80 ± 7   | 0.022                | <0.001               |
| <b>6d</b> | 47 ± 4              | 0.327                | 54 ± 4  | 0.002                | 59 ± 10  | 0.011                | 0.071                |
| <b>6e</b> | 44 ± 6              | 0.016                | 53 ± 5  | <0.001               | 51 ± 2   | 0.002                | 0.060                |

<sup>1</sup>p values refer to a comparison of  $K_d$ 's between **6a** and each of the other glycopolymers (t-test, two-tailed distribution, equal variance). <sup>2</sup>p values refer to a comparison of  $K_d$ 's for the same polymer at the lowest and highest surface densities (t-test, two-tailed distribution, equal variance).

**Table S5.** Apparent  $K_d$  values for *Wisteria floribunda* lectin (WFL).

| pol.      | apparent $K_d$ [nM] |                      |        |                      |         |                      | p value <sup>2</sup> |
|-----------|---------------------|----------------------|--------|----------------------|---------|----------------------|----------------------|
|           | 13 nm               | p value <sup>1</sup> | 25 nm  | p value <sup>1</sup> | 35 nm   | p value <sup>1</sup> |                      |
| <b>6a</b> | 79 ± 17             |                      | 85 ± 4 |                      | 86 ± 8  |                      | 0.483                |
| <b>6b</b> | 59 ± 9              | 0.076                | 62 ± 2 | <0.001               | 72 ± 10 | 0.070                | 0.089                |
| <b>6c</b> | 49 ± 7              | 0.017                | 49 ± 3 | <0.001               | 57 ± 3  | 0.001                | 0.067                |
| <b>6d</b> | 39 ± 6              | 0.087                | 39 ± 1 | 0.001                | 46 ± 4  | 0.004                | 0.150                |
| <b>6e</b> | 39 ± 7              | 0.005                | 40 ± 2 | <0.001               | 44 ± 2  | <0.001               | 0.263                |

<sup>1</sup>p values refer to a comparison of  $K_d$ 's between **6a** and each of the other glycopolymers (t-test, two-tailed distribution, equal variance). <sup>2</sup>p values refer to a comparison of  $K_d$ 's for the same polymer at the lowest and highest surface densities (t-test, two-tailed distribution, equal variance).

**Table S6.** Apparent  $K_d$  values for reduced form of *Wisteria floribunda* lectin (RWFL).

| pol.      | apparent $K_d$ [nM] |                      |          |                      |          |                      | p value <sup>2</sup> |
|-----------|---------------------|----------------------|----------|----------------------|----------|----------------------|----------------------|
|           | 13 nm               | p value <sup>1</sup> | 21 nm    | p value <sup>1</sup> | 31 nm    | p value <sup>1</sup> |                      |
| <b>6a</b> | 378 ± 49            |                      | 404 ± 62 |                      | 398 ± 52 |                      | 0.602                |
| <b>6b</b> | 313 ± 10            | 0.041                | 336 ± 31 | 0.096                | 363 ± 52 | 0.387                | 0.109                |
| <b>6c</b> | 252 ± 17            | 0.003                | 292 ± 20 | 0.014                | 322 ± 31 | 0.045                | 0.008                |
| <b>6d</b> | 196 ± 11            | 0.002                | 255 ± 19 | 0.034                | 268 ± 29 | 0.045                | 0.004                |
| <b>6e</b> | 188 ± 10            | <0.001               | 247 ± 23 | 0.003                | 267 ± 21 | 0.003                | <0.001               |

<sup>1</sup>p values refer to a comparison of  $K_d$ 's between **6a** and each of the other glycopolymers (t-test, two-tailed distribution, equal variance). <sup>2</sup>p values refer to a comparison of  $K_d$ 's for the same polymer at the lowest and highest surface densities (t-test, two-tailed distribution, equal variance).

**Table S7.** Apparent  $K_d$  values for *Vicia villosa*- $B_4$  agglutinin (VVA).

| pol.      | apparent $K_d$ [nM] |                      |         |                      |        |                      | p value <sup>2</sup> |
|-----------|---------------------|----------------------|---------|----------------------|--------|----------------------|----------------------|
|           | 13 nm               | p value <sup>1</sup> | 25 nm   | p value <sup>1</sup> | 35 nm  | p value <sup>1</sup> |                      |
| <b>6a</b> | 76 ± 4              |                      | 60 ± 10 |                      | 57 ± 7 |                      | 0.003                |
| <b>6b</b> | 61 ± 5              | 0.003                | 45 ± 9  | 0.058                | 46 ± 7 | 0.071                | 0.015                |
| <b>6c</b> | 45 ± 4              | <0.001               | 40 ± 5  | 0.012                | 36 ± 3 | 0.001                | 0.011                |
| <b>6d</b> | 32 ± 3              | 0.003                | 31 ± 3  | 0.020                | 28 ± 1 | 0.002                | 0.045                |
| <b>6e</b> | 29 ± 2              | <0.001               | 27 ± 4  | 0.001                | 25 ± 3 | <0.001               | 0.104                |

<sup>1</sup>p values refer to a comparison of  $K_d$ 's between **6a** and each of the other glycopolymers (t-test, two-tailed distribution, equal variance). <sup>2</sup>p values refer to a comparison of  $K_d$ 's for the same polymer at the lowest and highest surface densities (t-test, two-tailed distribution, equal variance).

**Table S8.** Apparent  $K_d$  values for *Helix pomatia* agglutinin (HPA).

| pol.      | apparent $K_d$ [nM] |                      |           |                      |           |                      | p value <sup>2</sup> |
|-----------|---------------------|----------------------|-----------|----------------------|-----------|----------------------|----------------------|
|           | 13 nm               | p value <sup>1</sup> | 25 nm     | p value <sup>1</sup> | 35 nm     | p value <sup>1</sup> |                      |
| <b>6a</b> | 2.6 ± 0.2           |                      | 1.3 ± 0.5 |                      | 1.2 ± 0.5 |                      | 0.002                |
| <b>6b</b> | 2.6 ± 0.3           | 0.962                | 1.3 ± 0.5 | 0.675                | 1.2 ± 0.5 | 0.952                | 0.002                |
| <b>6c</b> | 2.5 ± 0.3           | 0.643                | 1.3 ± 0.5 | 0.352                | 1.2 ± 0.5 | 0.891                | 0.003                |
| <b>6d</b> | 2.6 ± 0.3           | 0.567                | 1.2 ± 0.4 | 0.101                | 1.2 ± 0.3 | 0.992                | <0.001               |
| <b>6e</b> | 2.7 ± 0.3           | 0.652                | 1.2 ± 0.4 | 0.012                | 1.2 ± 0.2 | 0.861                | <0.001               |

<sup>1</sup>p values refer to a comparison of  $K_d$ 's between **6a** and each of the other glycopolymers (t-test, two-tailed distribution, equal variance). <sup>2</sup>p values refer to a comparison of  $K_d$ 's for the same polymer at the lowest and highest surface densities (t-test, two-tailed distribution, equal variance).

**Chart S1.** Apparent  $K_d$ 's for lectins obtained from the lowest surface density array plotted against GalNAc valency in polymers **6**.

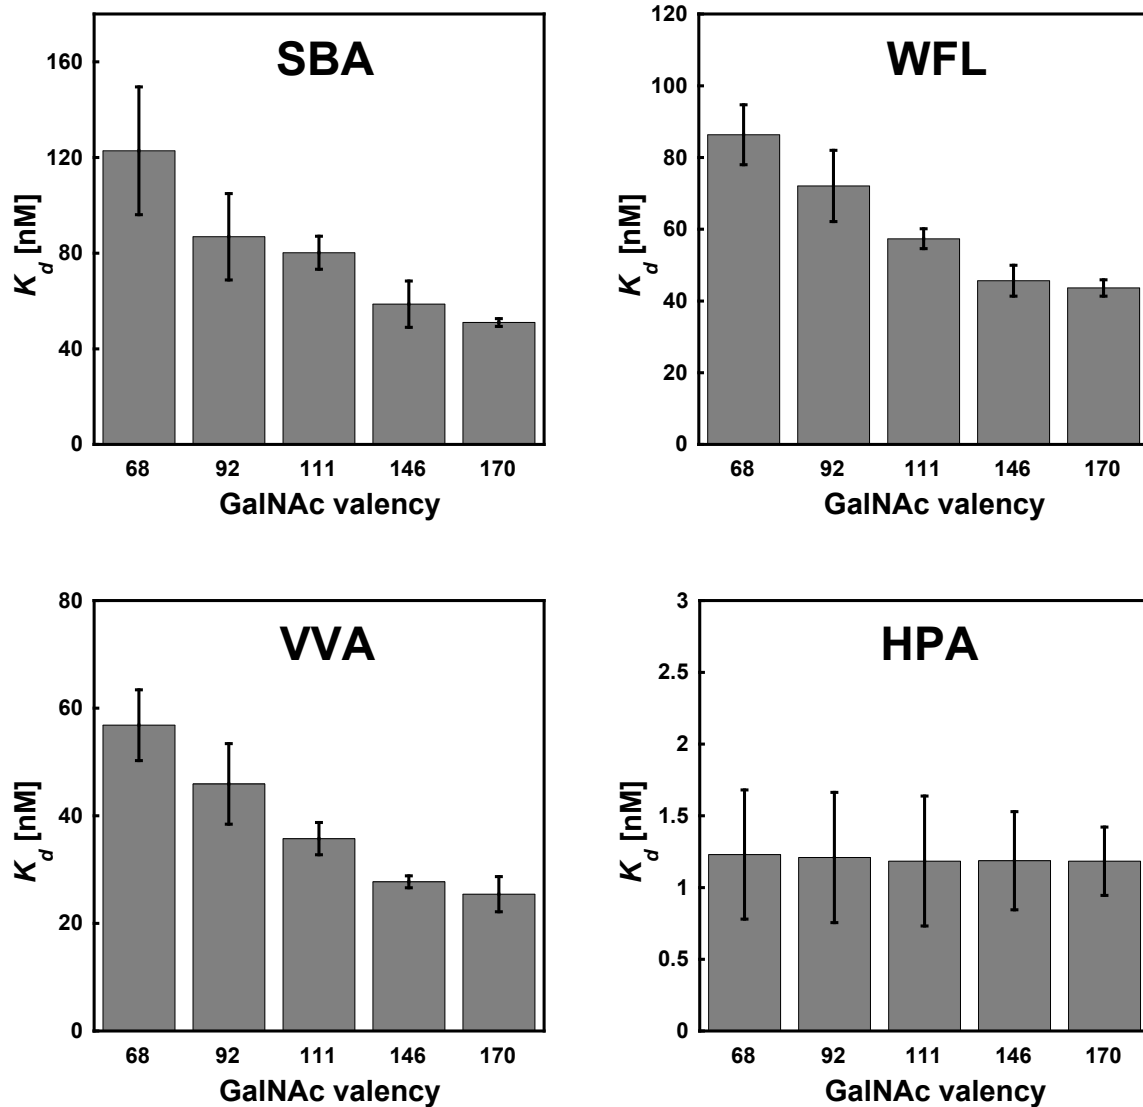

**Table S9.** Apparent  $K_d$  values for lectins toward polymer **9** in a density variant array.

| lectin      | apparent $K_d$ [nM] |            |            |                      | affinity enhancement<br>$K_{rel}^3$ |
|-------------|---------------------|------------|------------|----------------------|-------------------------------------|
|             | 7 nm                | 15nm       | 28 nm      | p value <sup>1</sup> |                                     |
| <b>SBA</b>  | 361 ± 148           | 1245 ± 292 | –*         | 0.009 <sup>2</sup>   | 3.5 <sup>4</sup>                    |
| <b>WFL</b>  | 866 ± 109           | 1284 ± 303 | 1587 ± 152 | 0.003                | 1.8                                 |
| <b>RWFL</b> | 748 ± 290           | 811 ± 262  | 629 ± 166  | 0.572                | N/A                                 |
| <b>VVA</b>  | 387 ± 134           | 514 ± 180  | 654 ± 191  | 0.011                | 1.7                                 |
| <b>HPA</b>  | 3.4 ± 1.1           | 3.9 ± 1.1  | 5.0 ± 0.7  | 0.049                | 1.5                                 |

\*apparent  $K_d$  too large to measure. <sup>1</sup>p values refer to a comparison of  $K_d$ 's at the lowest and highest surface densities (t-test, two-tailed distribution, equal variance). <sup>2</sup>p value refers to a comparison of  $K_d$ 's measured for average ligand spacing of 15 nm and 7 nm, respectively (t-test, two-tailed distribution, equal variance). <sup>3</sup> $K_{rel}$  is calculated as the ratio between apparent dissociation constants measured at the lowest and the highest surface densities (28 and 7 nm average ligand spacing, respectively). <sup>4</sup> $K_{rel}$  for SBA was calculated as the ratio between apparent dissociation constants measured for average ligand spacing of 15 nm and 7 nm, respectively.

**Table S10.** SBA and HPA precipitation by soluble glycopolymers **6b**, **6e**, and **9**.

| pol.                                   | valency | $P_{1/2}$ [μM] | p value <sup>1</sup> | p value <sup>2</sup> | lectin/<br>polymer <sup>3</sup> | GalNAc/<br>lectin | p value <sup>4</sup> |
|----------------------------------------|---------|----------------|----------------------|----------------------|---------------------------------|-------------------|----------------------|
| Soybean agglutinin (SBA):              |         |                |                      |                      |                                 |                   |                      |
| <b>6e</b>                              | 170     | 2.9 ± 0.2      | 0.009                |                      | 5.1 ± 0.3                       | 33 ± 2            | 0.007                |
| <b>6b</b>                              | 92      | 3.1 ± 0.7      | 0.015                |                      | 5.1 ± 1.4                       | 19 ± 4            |                      |
| <b>9</b>                               | 17      | 6.6 ± 1.3      |                      |                      | 2.3 ± 0.4                       | 7 ± 2             |                      |
| <i>Helix pomatia</i> agglutinin (HPA): |         |                |                      |                      |                                 |                   |                      |
| <b>6e</b>                              | 170     | 4.4 ± 0.8      | 0.001                | 0.034                | 3.5 ± 0.6                       | 50 ± 9            | 0.088                |
| <b>6b</b>                              | 92      | 5.7 ± 1.2      | 0.008                | 0.035                | 2.7 ± 0.6                       | 35 ± 8            |                      |
| <b>9</b>                               | 17      | 9.5 ± 0.4      |                      | 0.024                | 1.6 ± 0.1                       | 11 ± 1            |                      |

<sup>1</sup>p values refer to a comparison of  $P_{1/2}$  values for glycopolymers **6** and **9** (t-test, two-tailed distribution, equal variance). <sup>2</sup>p values refer to a comparison of  $P_{1/2}$  values for the precipitation of both lectins by the same glycopolymer (t-test, two-tailed distribution, equal variance). <sup>3</sup>lectin to polymer ratio in the precipitate at  $P_{1/2}$ . <sup>4</sup>p values refer to a comparison of GalNAc/lectin ratios for polymers **6e** and **6b**. Lectin stoichiometries and GalNAc per lectin ratios were determined as described in reference 33.

Chart S2. SBA and HPA precipitation by soluble glycopolymers **6b**, **6e**, and **9**.

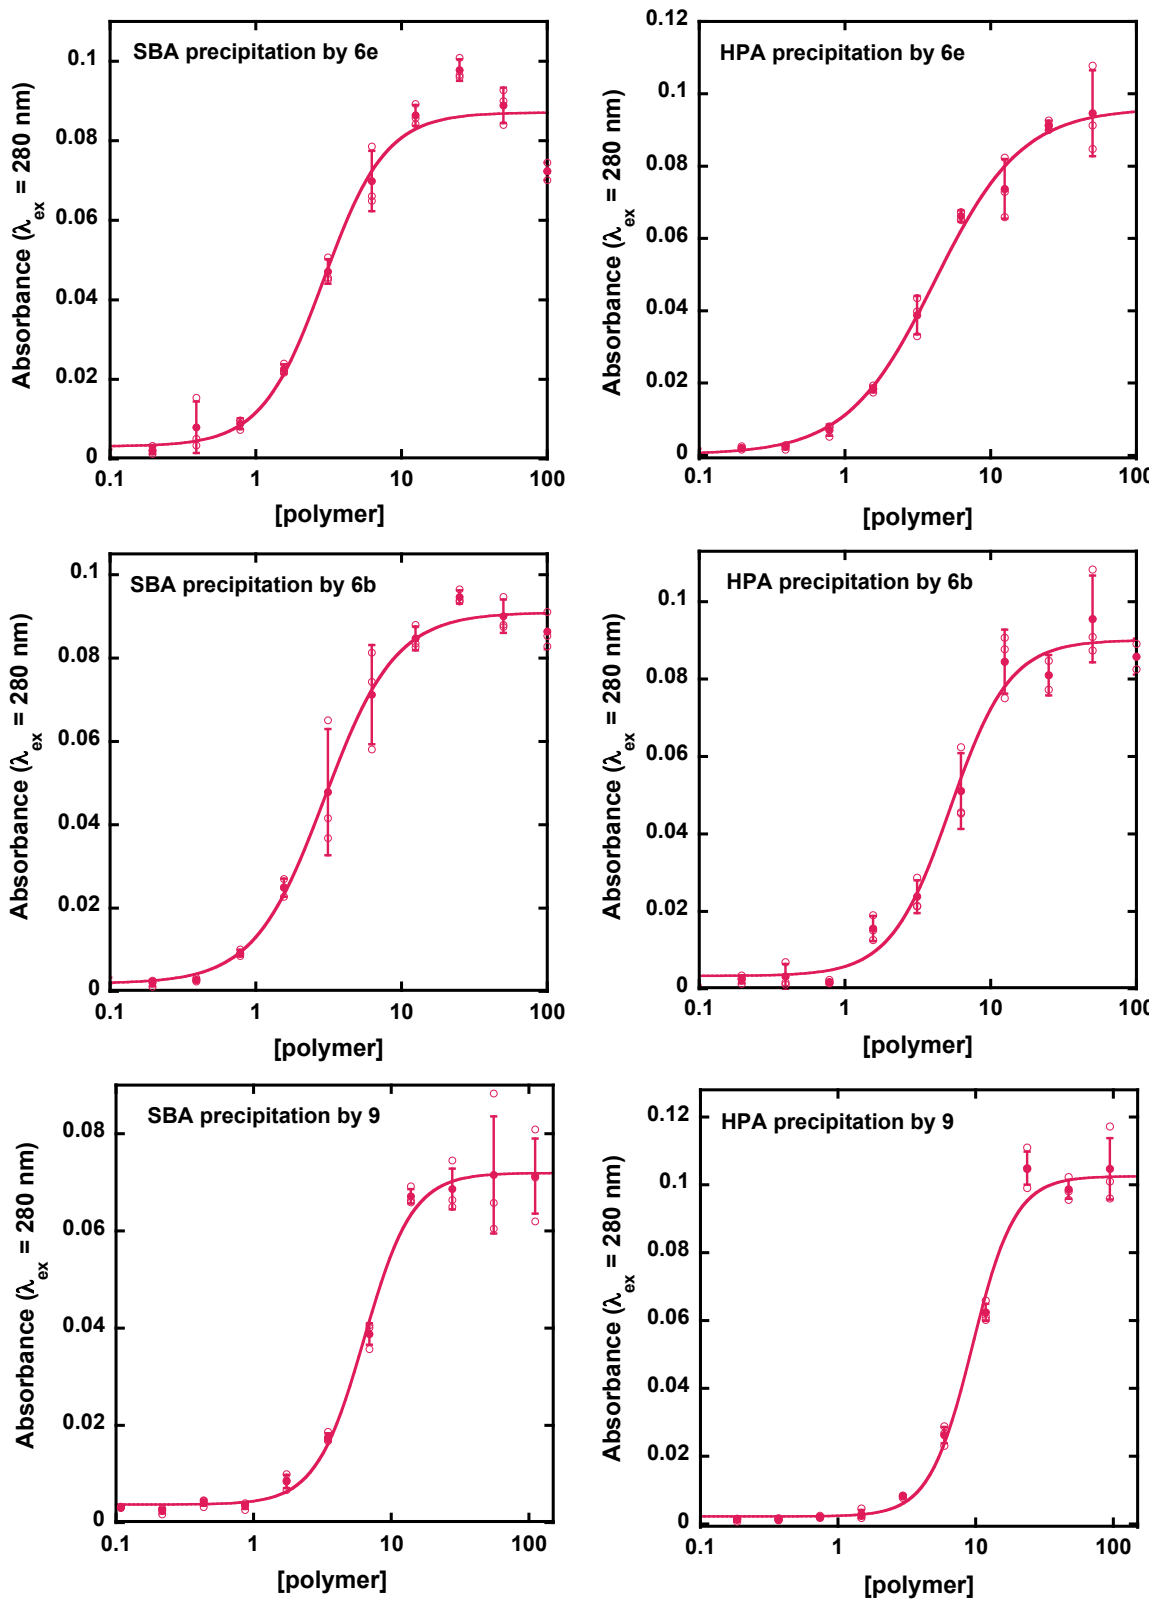

Supplement: ja302193u_si_001.pdf [file ja302193u_si_001.pdf]
